# Supplementary material for: Latonduine-1-Amino-Hydantoin Hybrid, Triazole-Fused Latonduine Schiff Bases and Their Metal Complexes: Synthesis, X-ray and Electron Diffraction, Molecular Docking Studies and Antiproliferative Activity
Source: MDPI journal article supplement (doi:10.3390/inorganics11010030), 2023-01-03
Supplement: s1 [file s1]

## Supplementary Material

for

# Latondaine-1-Amino-Hydantoin Hybrid, Triazole-Fused Latondaine Schiff Bases and Their Metal Complexes: Synthesis, X-ray and Electron Diffraction, Molecular Docking Studies and Antiproliferative Activity

Christopher Wittmann <sup>1</sup>, Tim Gruene <sup>1</sup>, Alexander Prado-Roller <sup>1</sup>, Sandra Arandelović <sup>2</sup>, Jóhannes Reynisson <sup>3</sup> and Vladimir B. Arion <sup>1,\*</sup>

<sup>1</sup> Institute of Inorganic Chemistry of the University of Vienna, Währinger Strasse 42, A1090 Vienna, Austria

<sup>2</sup> Institute of Oncology and Radiology of Serbia, Pasterova 14, 11000 Belgrade, Serbia

<sup>3</sup> School of Pharmacy and Bioengineering, Keele University, Hornbeam Building, Staffordshire ST5 5BG, UK

\* Correspondence: vladimir.arion@univie.ac.at

## Table of Contents

|                                                                      |                                      |
|----------------------------------------------------------------------|--------------------------------------|
| Numbering schemes.....                                               | S3                                   |
| Yields and analytical data of isolated proligands and complexes..... | <b>SError! Bookmark not defined.</b> |
| X-ray diffraction data.....                                          | <b>SError! Bookmark not defined.</b> |
| Synthesis of <i>C</i> * .....                                        | S5                                   |
| UV–vis stability data .....                                          | S6                                   |
| NMR spectra .....                                                    | S9                                   |
| Antiproliferative activity.....                                      | S15                                  |
| ESI-mass spectra.....                                                | S16                                  |
| Molecular docking .....                                              | S23                                  |

## Numbering schemes

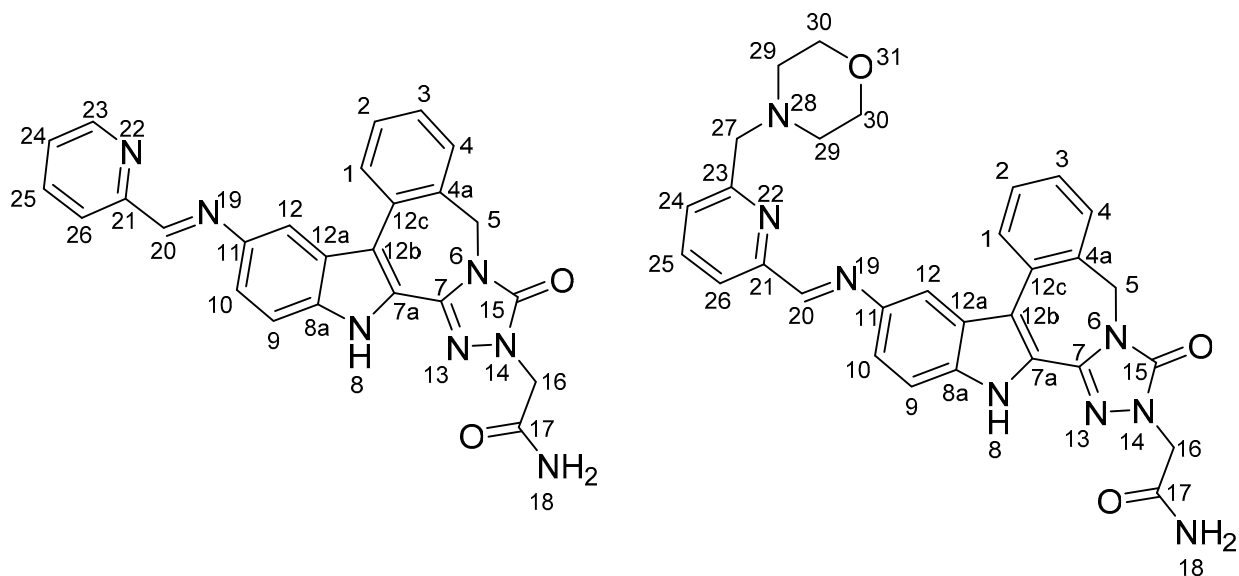

**Scheme S1.** Numbering scheme of **HL**<sup>1</sup> and **HL**<sup>2</sup>.

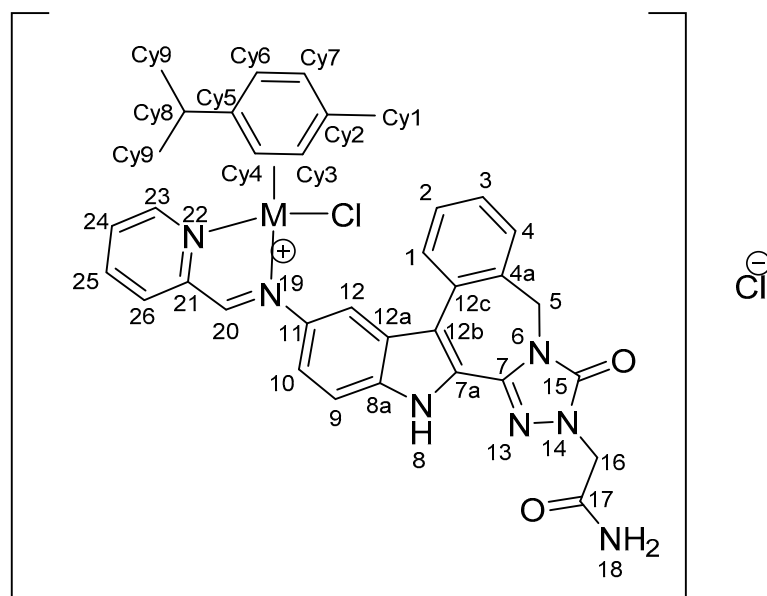

**Scheme S2.** Numbering scheme for complexes **1** (M = Ru) and **2** (M = Os).

**Table S1.** Yields and analytical data for **HL<sup>1</sup>** and **HL<sup>2</sup>**, and complexes **1–3**.

|                        |                             | <b>B</b>                                                                                                         | <b>HL<sup>1</sup></b>                                                                  | <b>HL<sup>2</sup></b>                                                                | <b>1</b>                                                                                                 | <b>2</b>                                                                                                 | <b>3</b>                                                                                                                                 |
|------------------------|-----------------------------|------------------------------------------------------------------------------------------------------------------|----------------------------------------------------------------------------------------|--------------------------------------------------------------------------------------|----------------------------------------------------------------------------------------------------------|----------------------------------------------------------------------------------------------------------|------------------------------------------------------------------------------------------------------------------------------------------|
| <b>Yield (%)</b>       |                             | 60                                                                                                               | 69                                                                                     | 71                                                                                   | 91                                                                                                       | 76                                                                                                       | 89                                                                                                                                       |
| <b>Brutto formula</b>  |                             | C <sub>19</sub> H <sub>14</sub> N <sub>6</sub> O <sub>4</sub> -<br>0.8H <sub>2</sub> O-<br>0.4CH <sub>3</sub> OH | C <sub>25</sub> H <sub>19</sub> N <sub>7</sub> O <sub>2</sub> -<br>1.1H <sub>2</sub> O | C <sub>30</sub> H <sub>28</sub> N <sub>8</sub> O <sub>3</sub> -<br>2H <sub>2</sub> O | C <sub>35</sub> H <sub>33</sub> N <sub>7</sub> O <sub>2</sub> RuCl <sub>2</sub> -<br>2.5H <sub>2</sub> O | C <sub>35</sub> H <sub>33</sub> N <sub>7</sub> O <sub>2</sub> OsCl <sub>2</sub> -<br>2.4H <sub>2</sub> O | C <sub>30</sub> H <sub>28</sub> N <sub>8</sub> O <sub>3</sub> CuCl <sub>2</sub> -<br>H <sub>2</sub> O·0.3C <sub>3</sub> H <sub>8</sub> O |
| <b>M<sub>r</sub></b>   |                             | 417.58                                                                                                           | 469.28                                                                                 | 584.62                                                                               | 800.69                                                                                                   | 888.05                                                                                                   | 719.09                                                                                                                                   |
| <b>C (%)</b>           | <b>calcd</b>                | 55.79                                                                                                            | 63.98                                                                                  | 61.63                                                                                | 52.5                                                                                                     | 47.33                                                                                                    | 51.61                                                                                                                                    |
|                        | <b>found</b>                | 55.92                                                                                                            | 63.78                                                                                  | 61.85                                                                                | 52.52                                                                                                    | 47.65                                                                                                    | 51.51                                                                                                                                    |
| <b>H (%)</b>           | <b>calcd</b>                | 4.15                                                                                                             | 4.55                                                                                   | 5.51                                                                                 | 4.78                                                                                                     | 4.29                                                                                                     | 4.54                                                                                                                                     |
|                        | <b>found</b>                | 3.98                                                                                                             | 4.3                                                                                    | 5.21                                                                                 | 4.52                                                                                                     | 4.05                                                                                                     | 4.35                                                                                                                                     |
| <b>N (%)</b>           | <b>calcd</b>                | 20.12                                                                                                            | 20.89                                                                                  | 19.16                                                                                | 12.24                                                                                                    | 11.04                                                                                                    | 15.58                                                                                                                                    |
|                        | <b>found</b>                | 19.76                                                                                                            | 20.71                                                                                  | 19.26                                                                                | 11.85                                                                                                    | 11.01                                                                                                    | 15.36                                                                                                                                    |
| <b>O (%)</b>           | <b>calcd</b>                |                                                                                                                  |                                                                                        | 9.56                                                                                 |                                                                                                          | 7.92                                                                                                     |                                                                                                                                          |
|                        | <b>found</b>                |                                                                                                                  |                                                                                        | 9.96                                                                                 |                                                                                                          | 8.11                                                                                                     |                                                                                                                                          |
| <b>ESI-MS</b>          | <b>[M + H]<sup>+</sup></b>  | 391.17                                                                                                           | 450.25                                                                                 | 549.33                                                                               |                                                                                                          |                                                                                                          |                                                                                                                                          |
|                        | <b>[M + Na]<sup>+</sup></b> |                                                                                                                  | 472.22                                                                                 |                                                                                      |                                                                                                          |                                                                                                          |                                                                                                                                          |
|                        | <b>[M - Cl]<sup>+</sup></b> |                                                                                                                  |                                                                                        |                                                                                      | 720.21                                                                                                   | 810.26                                                                                                   | 646.2                                                                                                                                    |
| <b>X-ray structure</b> |                             | YES                                                                                                              | YES                                                                                    |                                                                                      |                                                                                                          |                                                                                                          | YES                                                                                                                                      |

**Crystallographic data obtained from both X-ray diffraction and electron diffraction techniques**

**Table S2.** Crystallographic data and refinement details for B·CH<sub>3</sub>OH and HL<sup>1</sup>·2DMF and 3.

| Compound                                   | B·CH <sub>3</sub> OH                                          | HL <sup>1</sup> ·2DMF                                         | 3                                                                               |
|--------------------------------------------|---------------------------------------------------------------|---------------------------------------------------------------|---------------------------------------------------------------------------------|
| empirical formula                          | C <sub>20</sub> H <sub>18</sub> N <sub>6</sub> O <sub>5</sub> | C <sub>31</sub> H <sub>33</sub> N <sub>9</sub> O <sub>4</sub> | C <sub>30</sub> H <sub>28</sub> Cl <sub>2</sub> CuN <sub>8</sub> O <sub>3</sub> |
| fw                                         | 422.40                                                        | 595.66                                                        | 683.05                                                                          |
| space group                                | monoclinic, <i>C2/c</i>                                       | triclinic, <i>P</i> $\bar{1}$                                 | monoclinic, <i>P2<sub>1</sub>/n</i>                                             |
| <i>a</i> , Å                               | 34.647(14)                                                    | 8.7154(7)                                                     | 11.16(3)                                                                        |
| <i>b</i> , Å                               | 11.809(5)                                                     | 11.8767(10)                                                   | 9.602(13)                                                                       |
| <i>c</i> , Å                               | 19.252(7)                                                     | 15.5370(16)                                                   | 26.92(7)                                                                        |
| $\alpha$ , °                               | 90                                                            | 111.185(5)                                                    | 90                                                                              |
| $\beta$ , °                                | 98.83(2)                                                      | 95.529(4)                                                     | 94.6(5)                                                                         |
| $\gamma$ , °                               | 90                                                            | 90.420(4)                                                     | 90                                                                              |
| <i>V</i> [Å <sup>3</sup> ]                 | 7784(5)                                                       | 1491.0(2)                                                     | 2877(11)                                                                        |
| <i>Z</i>                                   | 16                                                            | 2                                                             | 4                                                                               |
| $\lambda$ [Å]                              | 0.71073                                                       | 0.71073                                                       | 0.02508                                                                         |
| $\rho_{\text{calcd}}$ , g cm <sup>-3</sup> | 1.442                                                         | 1.327                                                         | 1.577                                                                           |
| cryst size, mm <sup>3</sup>                | 0.44 × 0.13 × 0.04                                            | 0.20 × 0.20 × 0.20                                            | 0.005 × 0.0013 × 0.0005                                                         |
| <i>T</i> [K]                               | 100(2)                                                        | 100(2)                                                        | 148(1)                                                                          |
| $\mu$ , mm <sup>-1</sup>                   | 0.107                                                         | 0.092                                                         |                                                                                 |
| <i>R</i> <sub>1</sub> <sup>a</sup>         | 0.0616                                                        | 0.0577                                                        | 0.1985                                                                          |
| <i>wR</i> <sub>2</sub> <sup>b</sup>        | 0.1569                                                        | 0.1655                                                        | 0.5049                                                                          |
| GOF <sup>c</sup>                           | 0.956                                                         | 1.011                                                         | 1.514                                                                           |

<sup>a</sup>  $R_1 = \Sigma ||F_o| - |F_c|| / \Sigma |F_o|$ . <sup>b</sup>  $wR_2 = \{\Sigma [w(F_o^2 - F_c^2)^2] / \Sigma [w(F_o^2)^2]\}^{1/2}$ . <sup>c</sup>  $\text{GOF} = \{\Sigma [w(F_o^2 - F_c^2)^2] / (n - p)\}^{1/2}$ , where *n* is the number of reflections and *p* is the total number of parameters refined.

**Synthesis of C\***

To species **C** (225 mg, 0.61 mmol) in MeOH (20 mL) triethylamine (1 mL) was added. The solution was stirred at 80 °C for 3 h. The precipitate was filtered off after cooling to room temperature and washed with Et<sub>2</sub>O (1 mL). The product was dried to give a light-beige solid. Yield: 156 mg. <sup>1</sup>H NMR (500 MHz, DMSO-*d*<sub>6</sub>)  $\delta$  11.88 (s, 1H), 7.88 (t, *J* = 7.4 Hz, 1H), 7.56 (d, *J* = 7.4 Hz, 2H), 7.50 (td, *J* = 7.7, 1.2 Hz, 1H), 7.35 – 7.26 (m, 2H), 7.24 (t, *J* = 6.8 Hz, 1H), 7.14 (d, *J* = 1.7 Hz, 1H), 6.72 (dt, *J* = 11.8, 5.9 Hz, 1H), 4.81 (s, 2H), 4.69 (s, 2H), 4.36 (s, 2H).

### UV-vis stability data

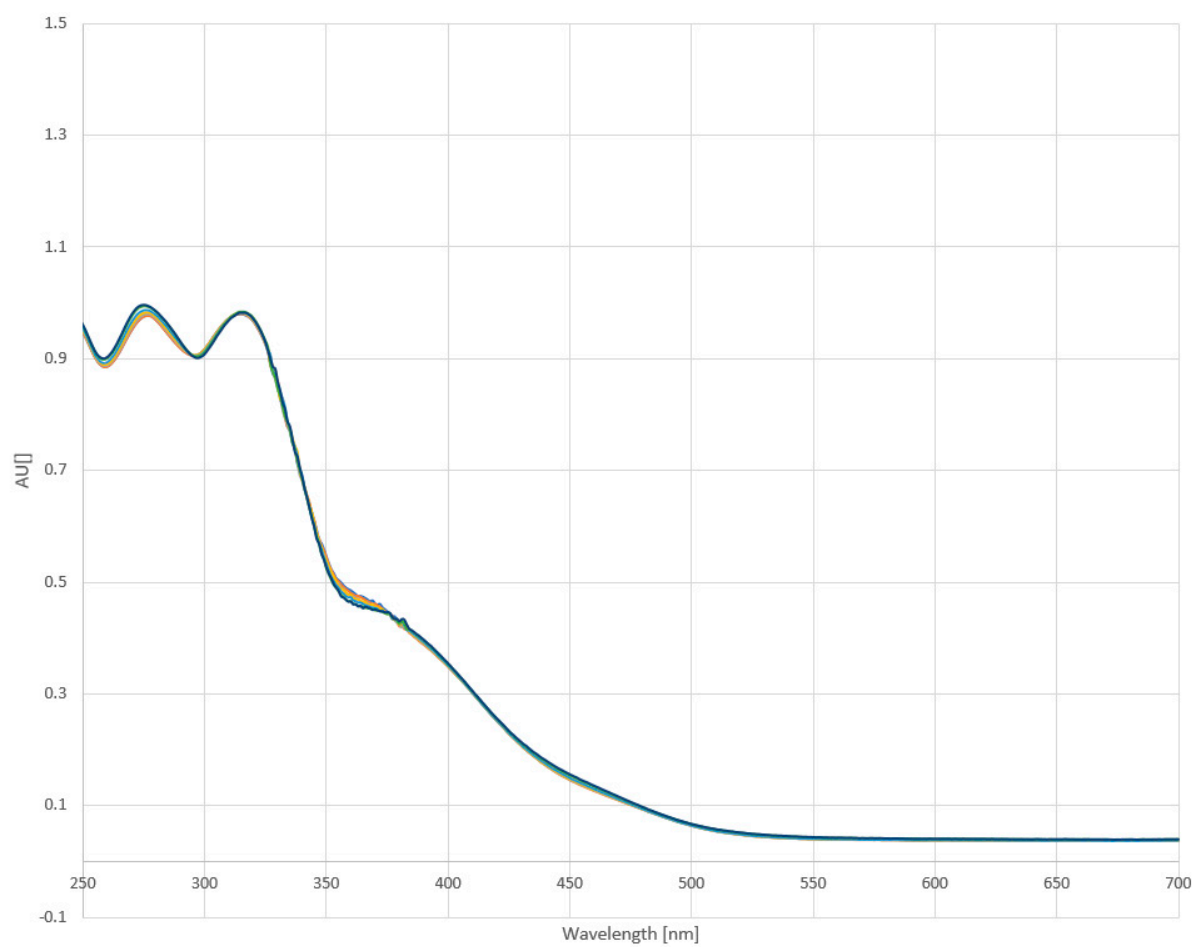

**Figure S1.** UV-vis absorption spectra of **1** (35  $\mu$ M) in DMSO/H<sub>2</sub>O 1/99 monitored over 72 h.

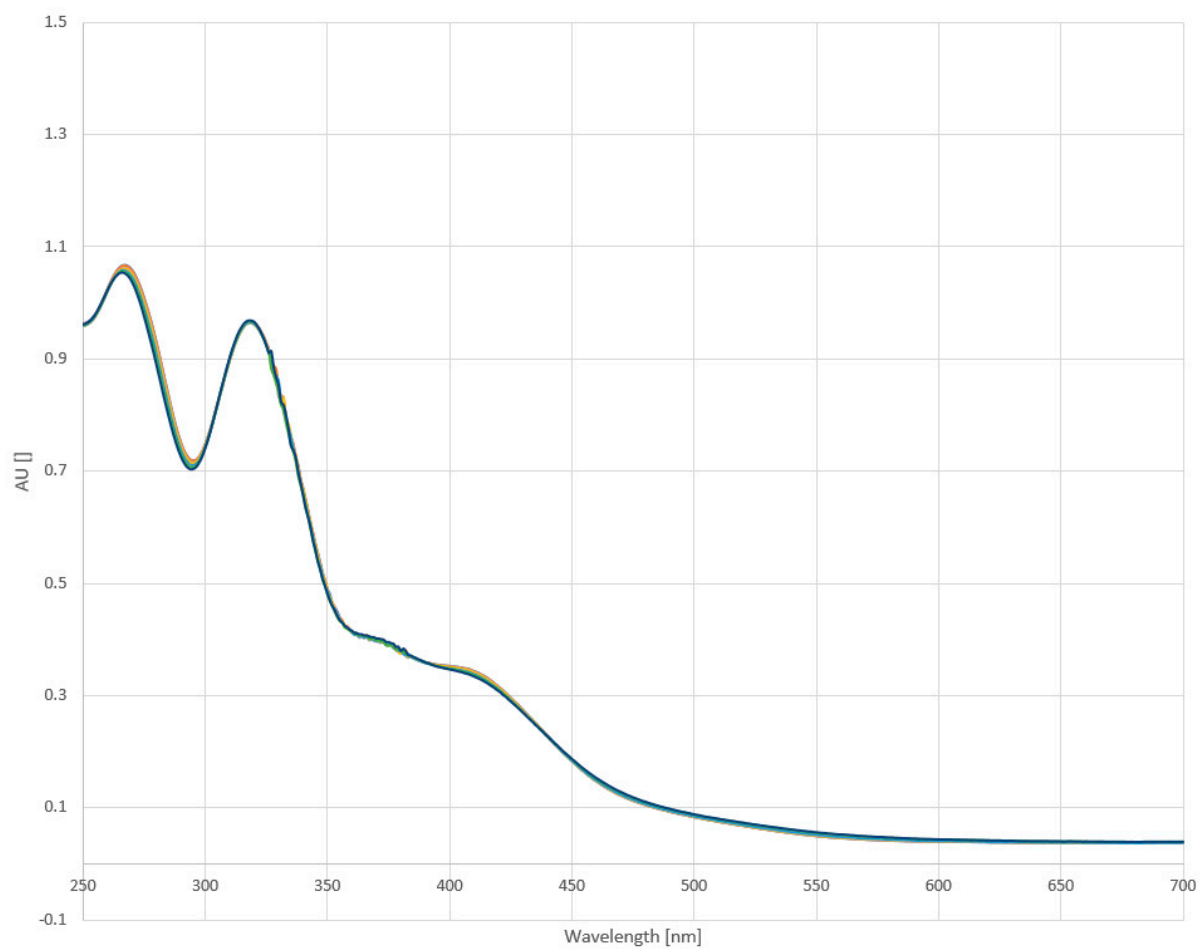

**Figure S2.** UV–vis absorption spectra of **2** (37  $\mu\text{M}$ ) in DMSO/H<sub>2</sub>O 1/99 monitored over 72 h.

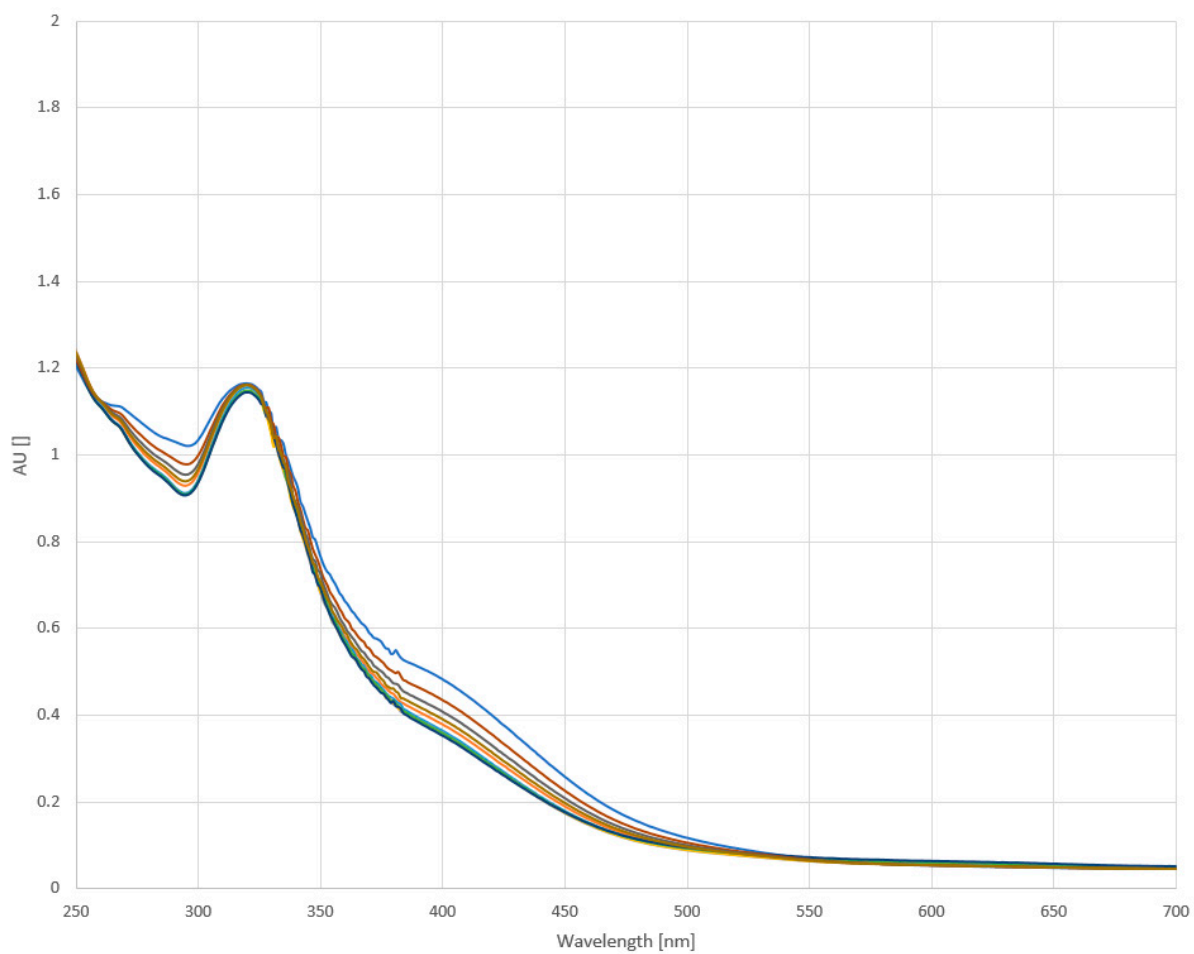

**Figure S3.** UV-vis absorption spectra of **3** (49  $\mu\text{M}$ ) in DMSO/H<sub>2</sub>O 1/99 monitored over 72 h.

## NMR spectra

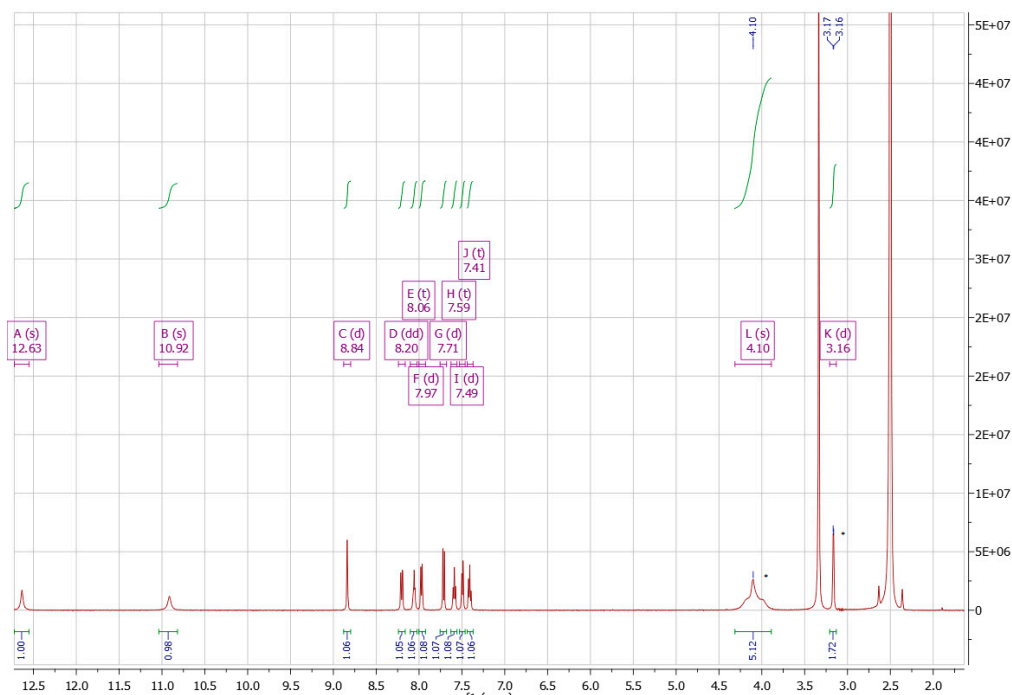

**Figure S4.**  $^1\text{H}$  NMR spectrum of **B**. Residual MeOH is marked with an asterisk (\*).

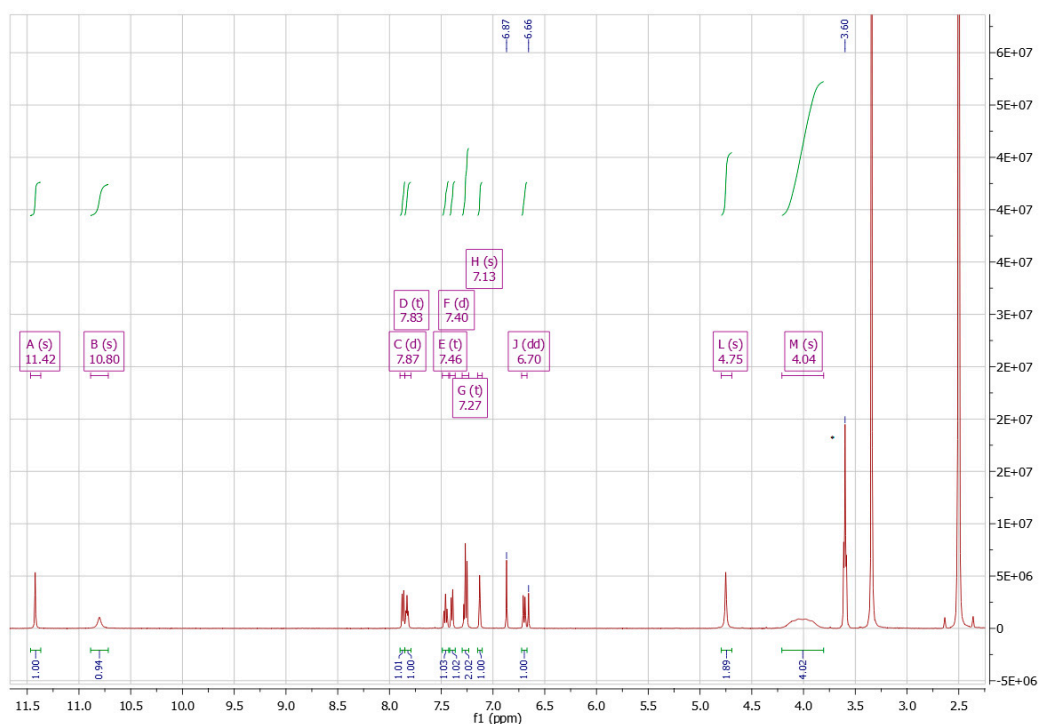

**Figure S5.**  $^1\text{H}$  NMR spectrum of **C**. Residual THF is marked with an asterisk (\*).

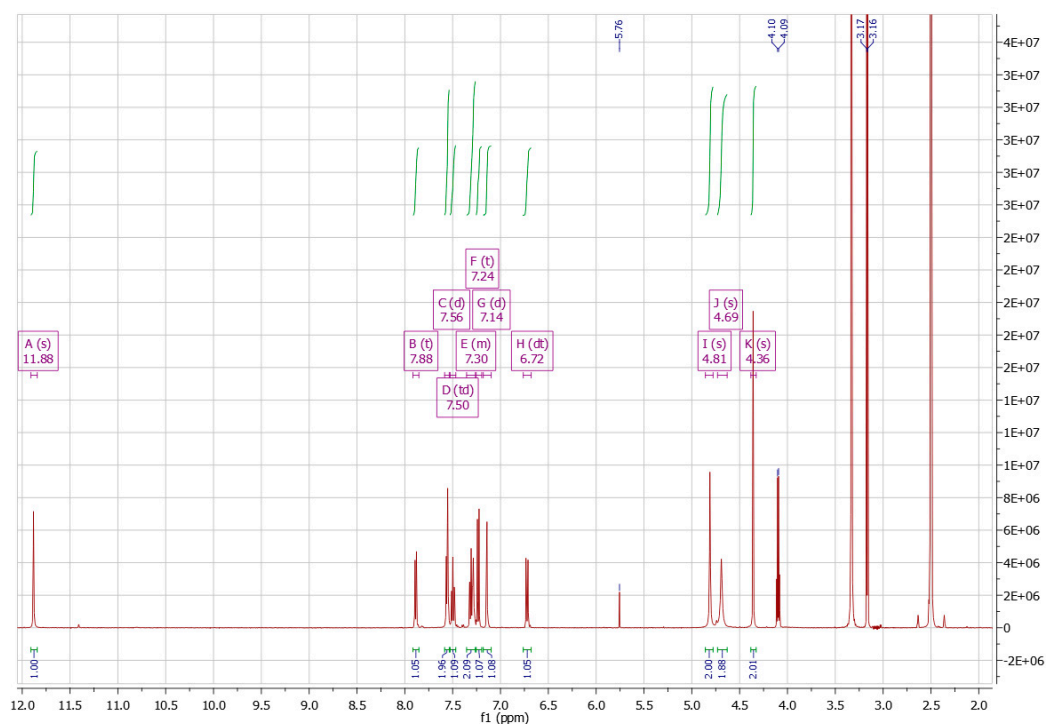

**Figure S6.**  $^1\text{H}$  NMR spectrum of **C\***. Residual solvents are identified by their respective chemical shifts on the top.

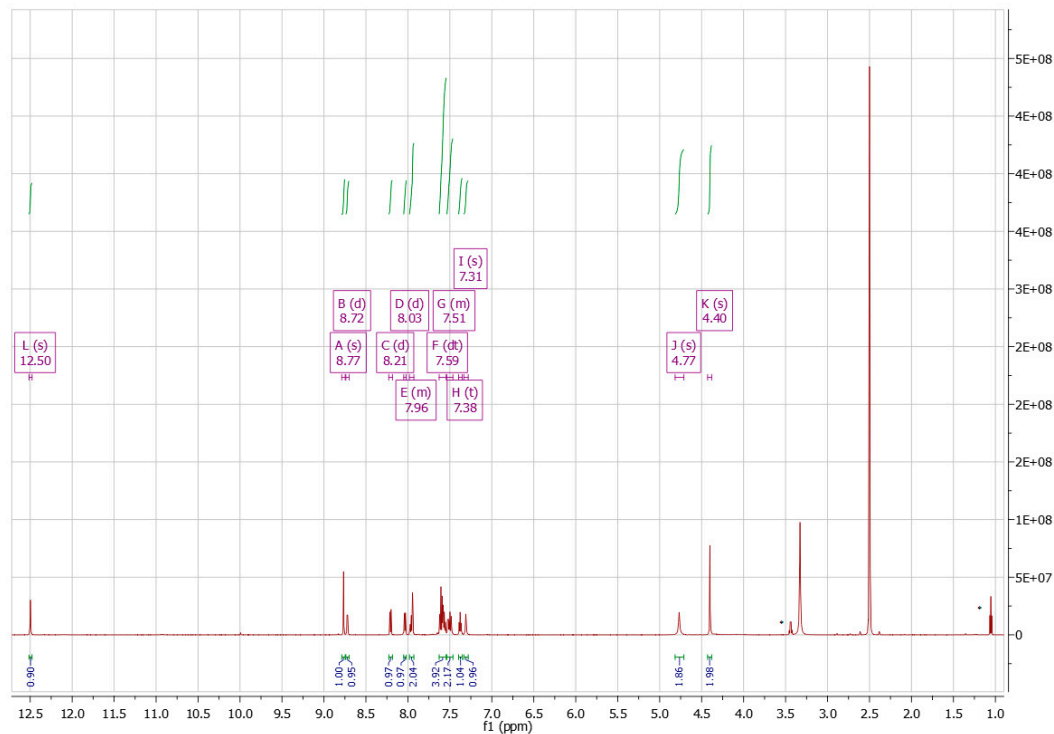

**Figure S7.**  $^1\text{H}$  NMR spectrum of **HL<sup>1</sup>**. Residual EtOH is marked with an asterisk (\*).

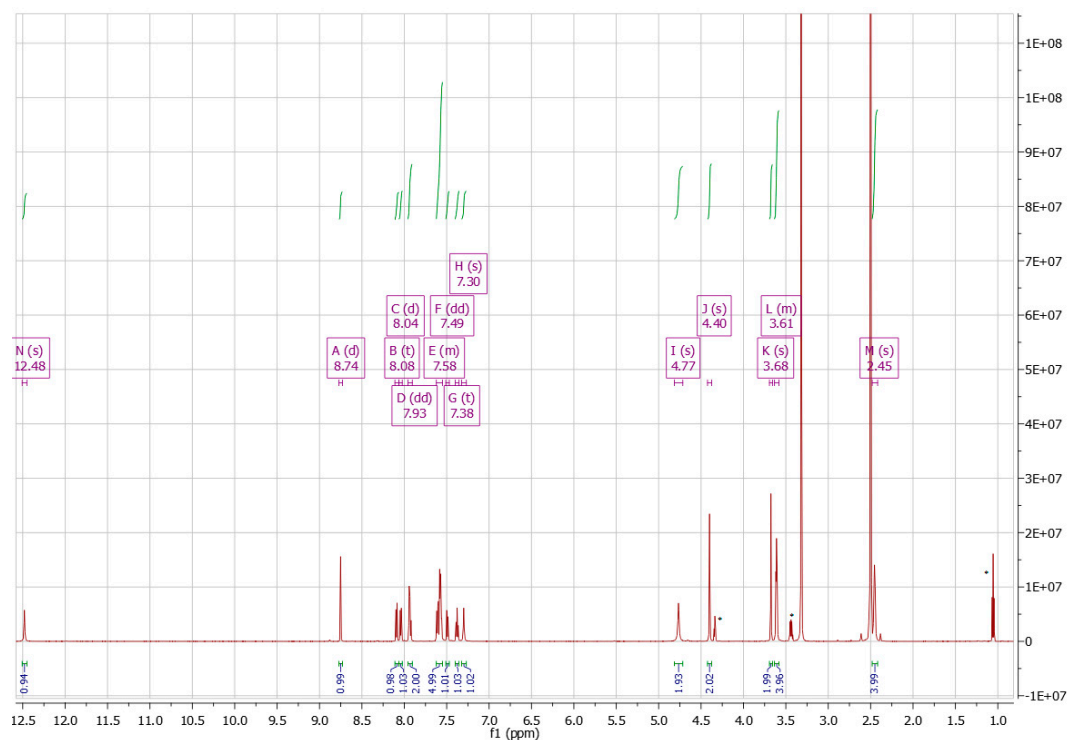

**Figure S8.**  $^1\text{H}$  NMR spectrum of **HL**<sup>2</sup>. Residual EtOH is marked with an asterisk (\*).

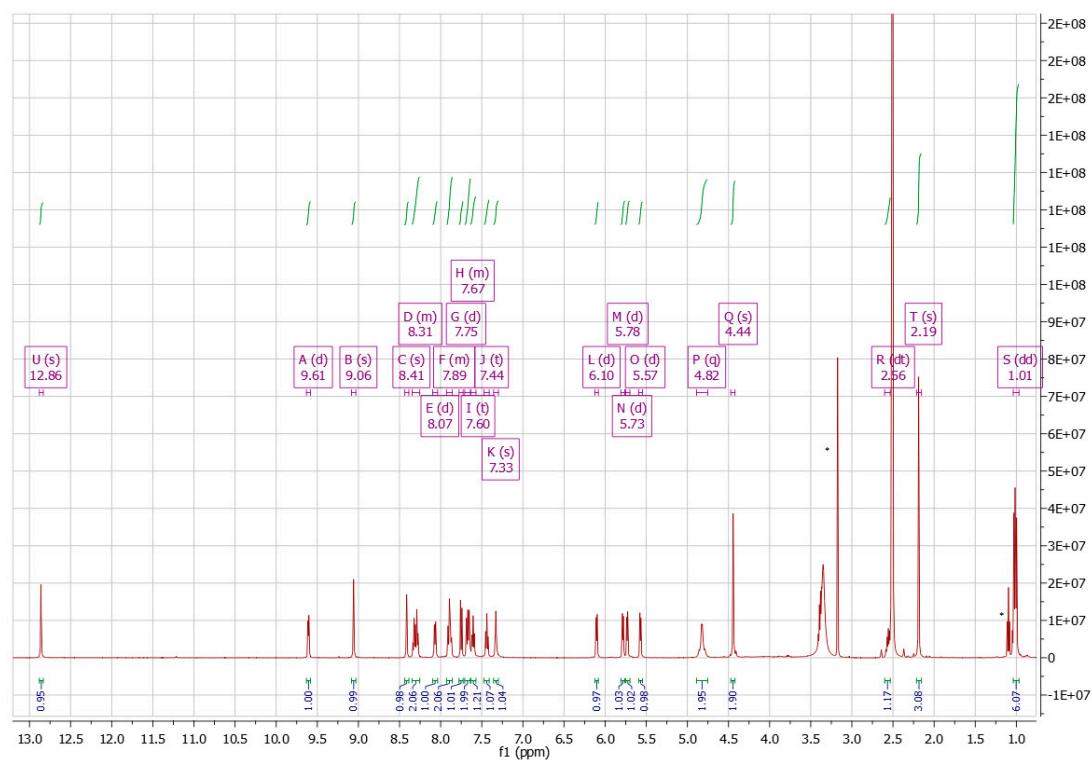

**Figure S9.**  $^1\text{H}$  NMR spectrum of **1**. Residual  $i\text{PrOH}$  is marked with an asterisk (\*).

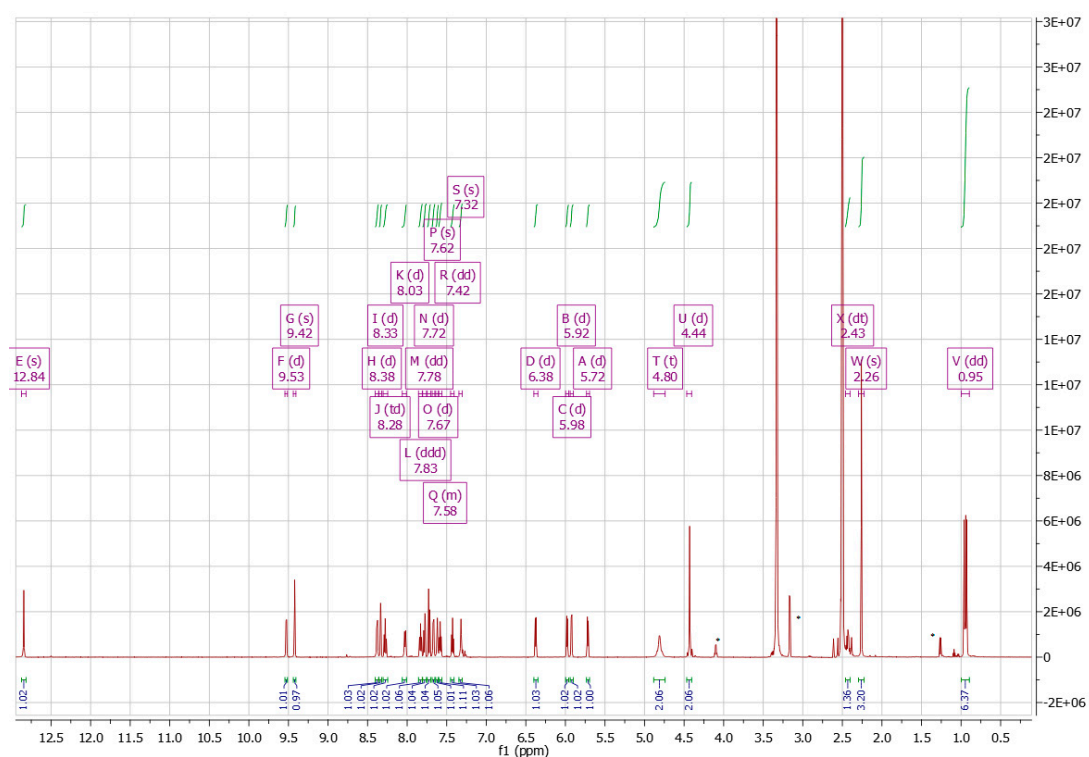

**Figure S10.**  $^1\text{H}$  NMR spectrum of **2**. Residual  $i\text{PrOH}$  is marked with an asterisk (\*).

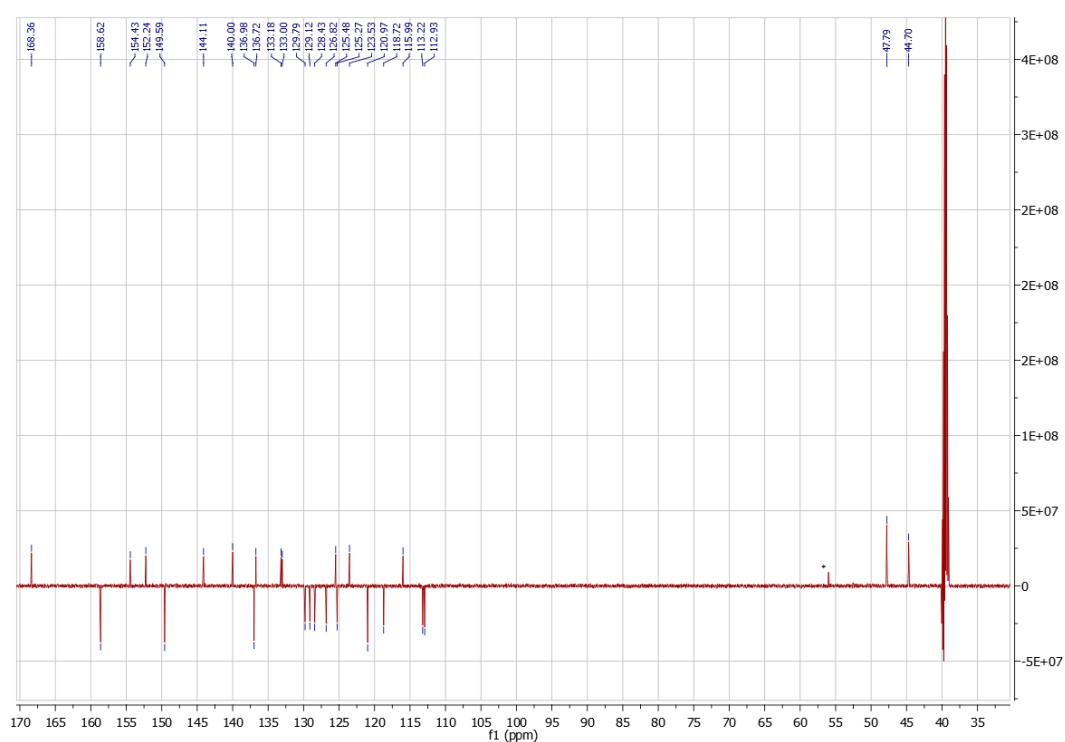

**Figure S11.**  $^{13}\text{C}$  NMR spectrum of **HL<sup>1</sup>**. Residual  $\text{EtOH}$  is marked with an asterisk (\*).

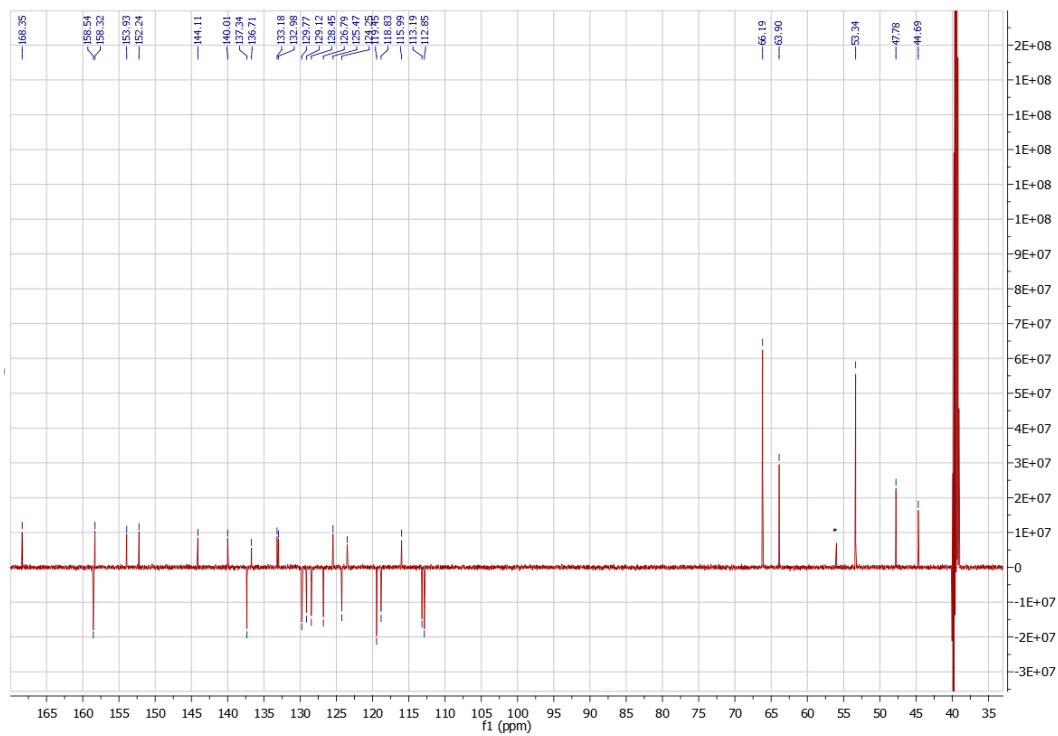

**Figure S12.** <sup>13</sup>C NMR spectrum of **HL**<sup>2</sup>. Residual EtOH is marked with an asterisk (\*).

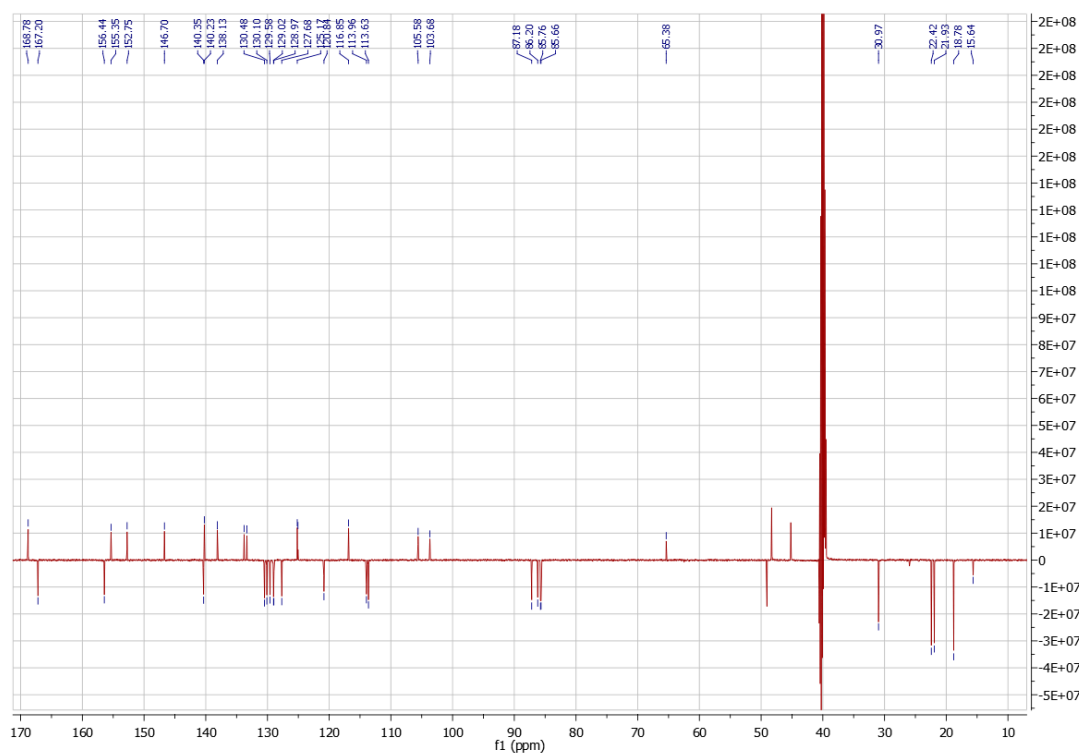

**Figure S13.** <sup>13</sup>C NMR spectrum of **1**.

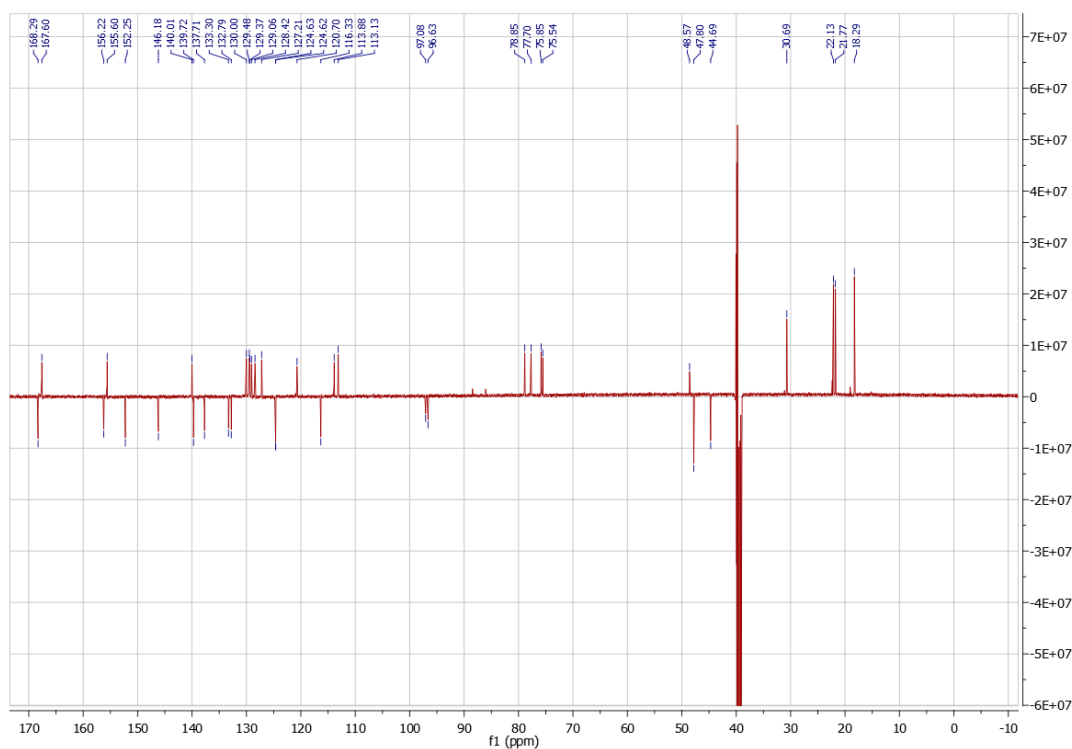

**Figure S14.**  $^{13}\text{C}$  NMR spectrum of **2**.

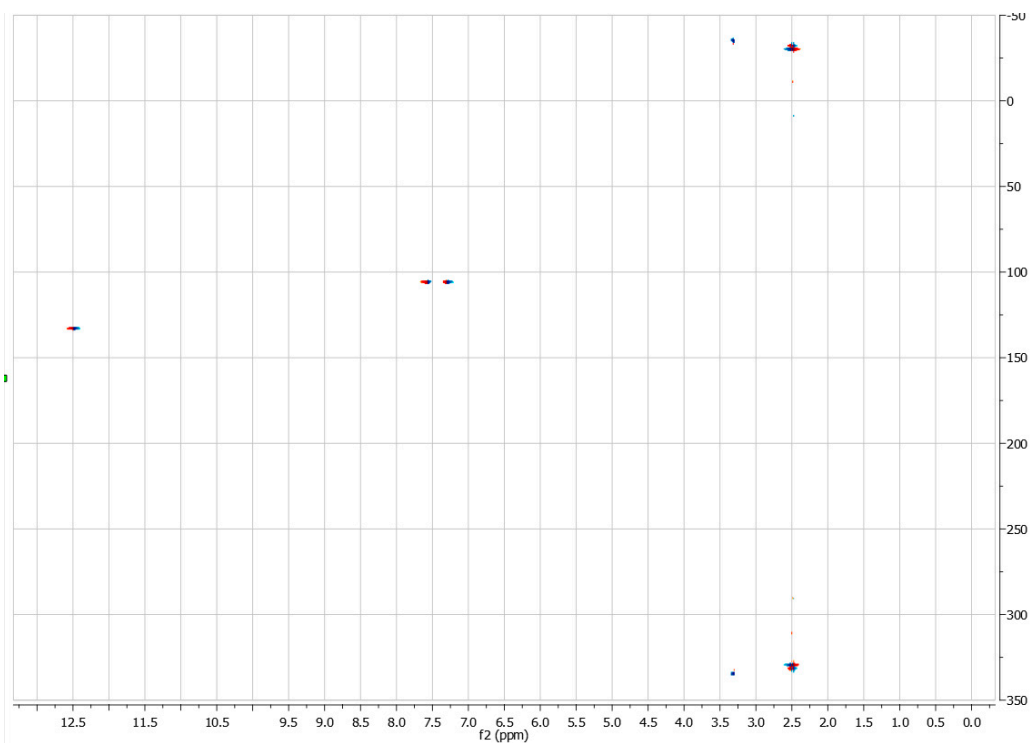

**Figure S15.**  $^{15}\text{N}$ - $^1\text{H}$  HSQC NMR spectrum of **HL<sup>1</sup>**.

## Antiproliferative Activity

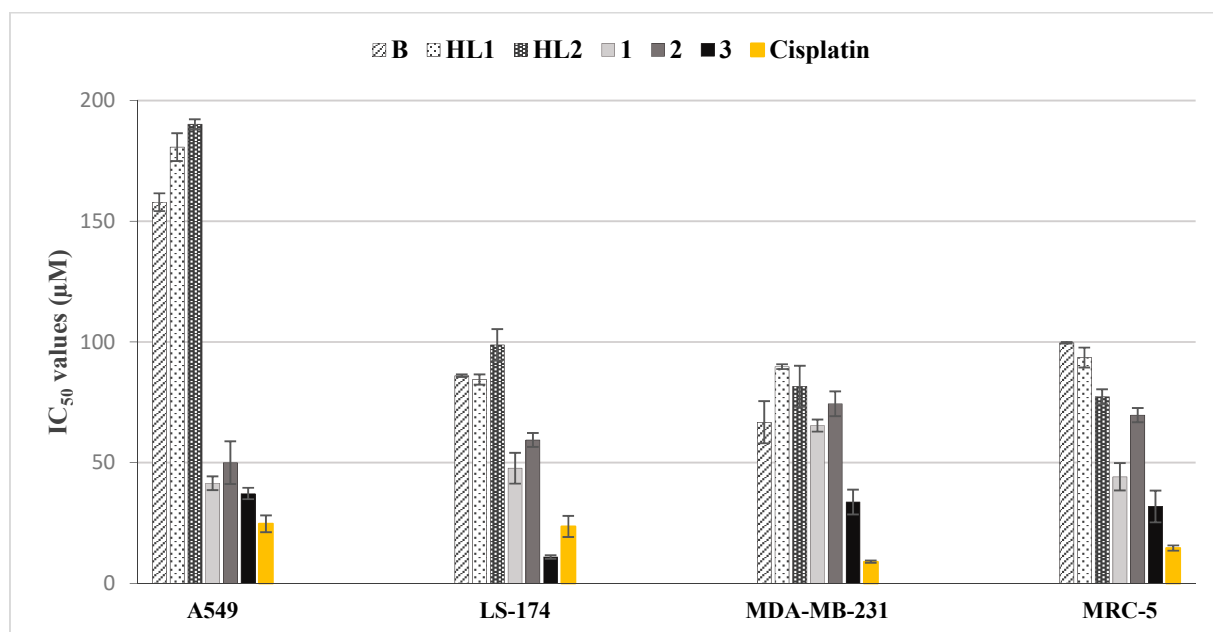

**Figure S16.** Bar graphs present IC<sub>50</sub> values (μM) of tested complexes and ligands vs cisplatin in three human tumor cell lines (A549, LS-174, MDA-MB-231) and non-tumor MRC-5 cells. Each IC<sub>50</sub> value presents average of at least three independent experiments ± SD, obtained for 72 h action using MTT assay.

## ESI-mass spectra

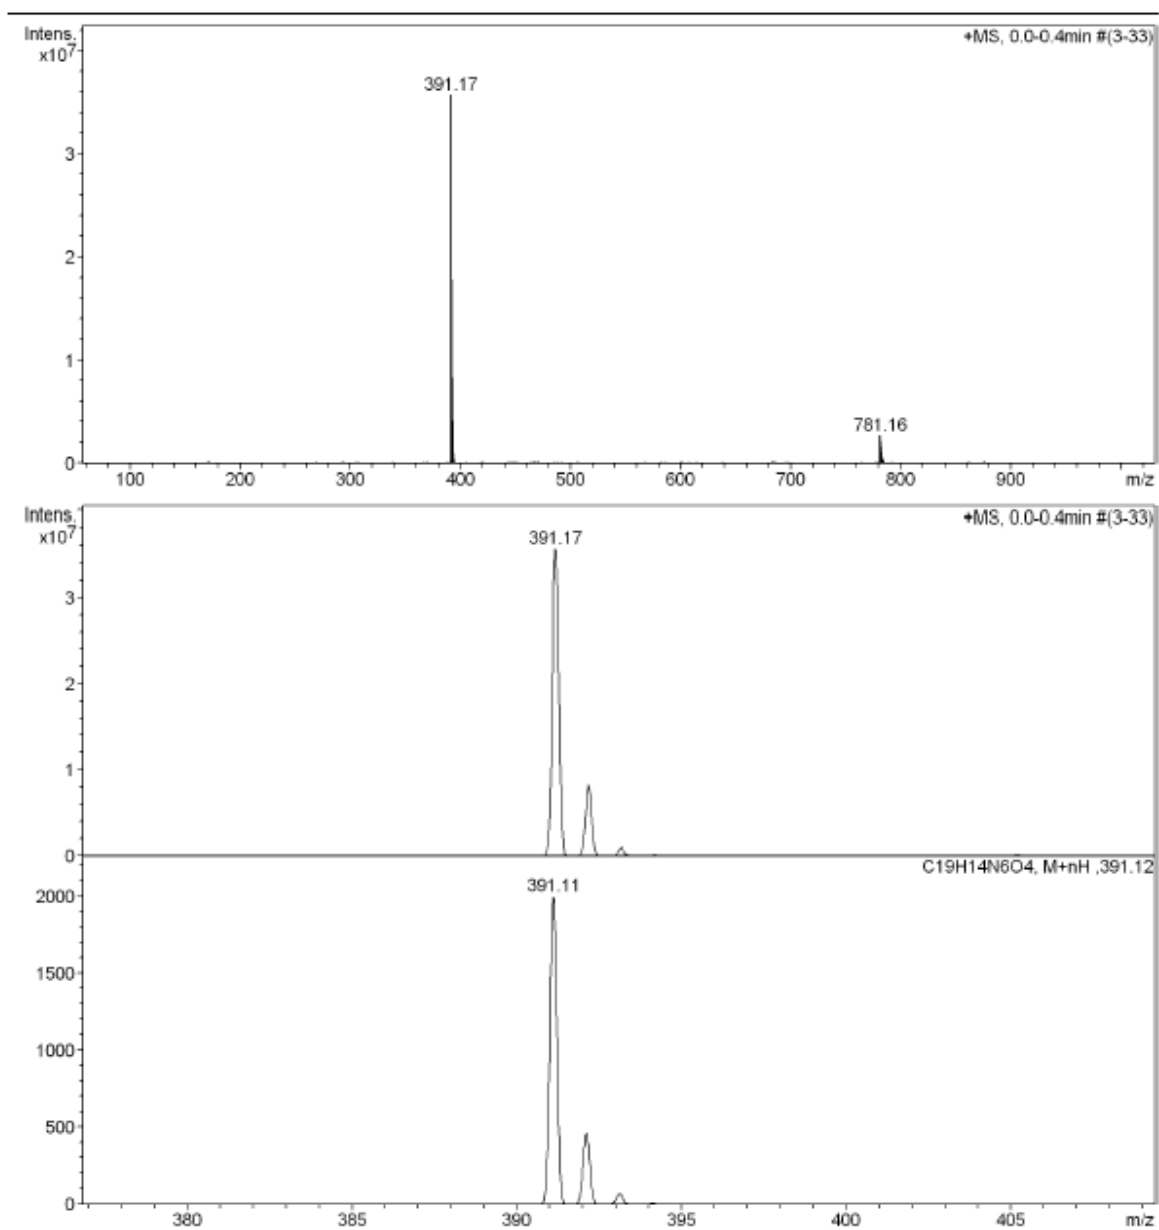

**Figure S17.** Positive ion ESI-mass spectrum of **B**.

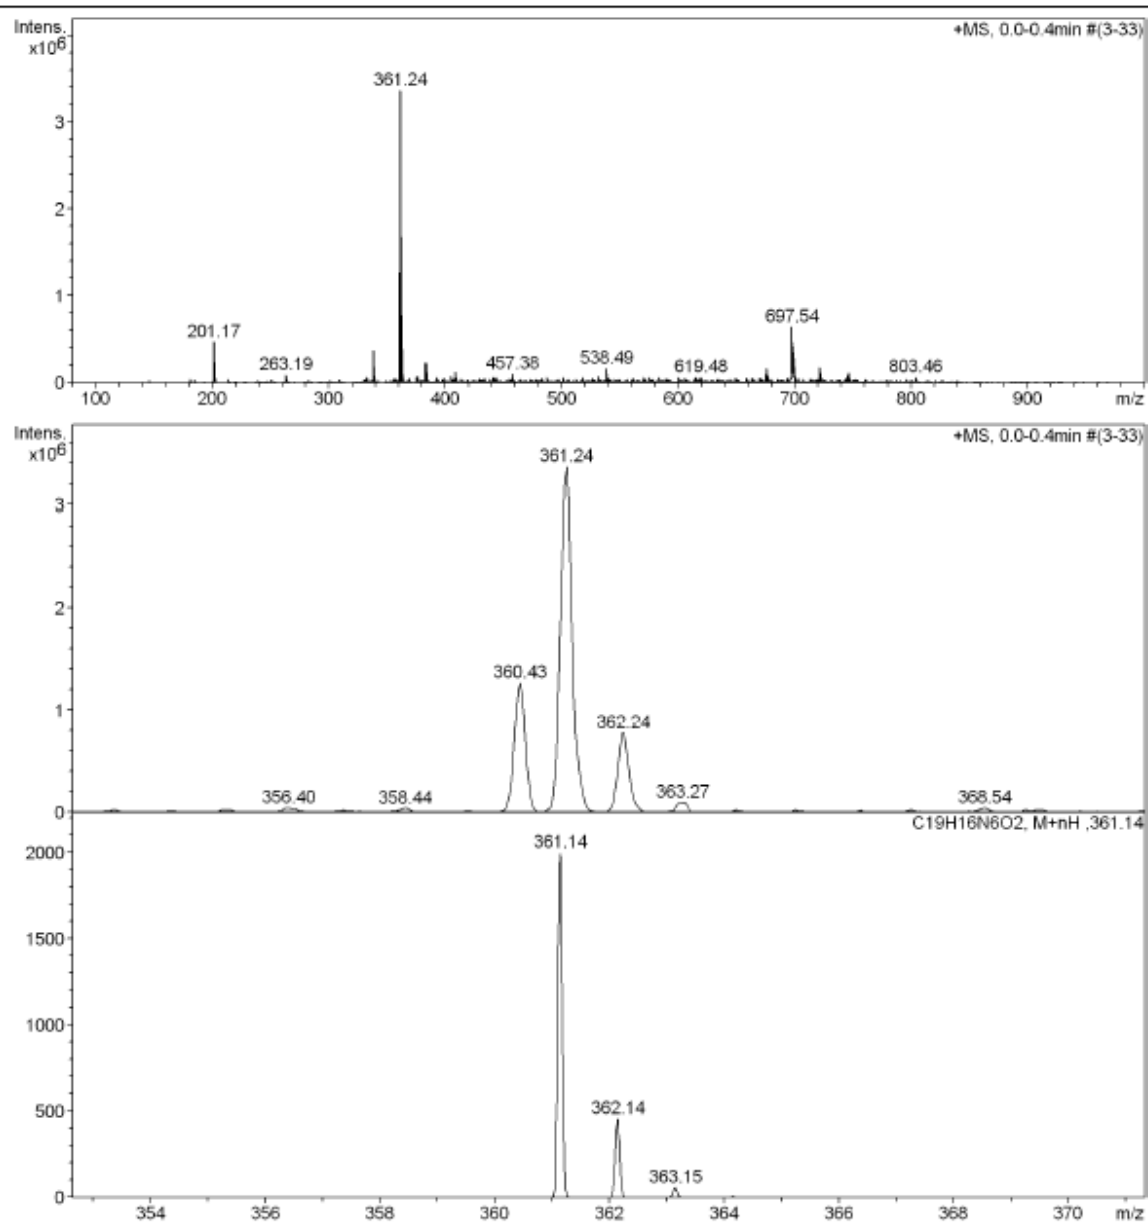

**Figure S18.** Positive ion mode of ESI-mass spectrum of C.

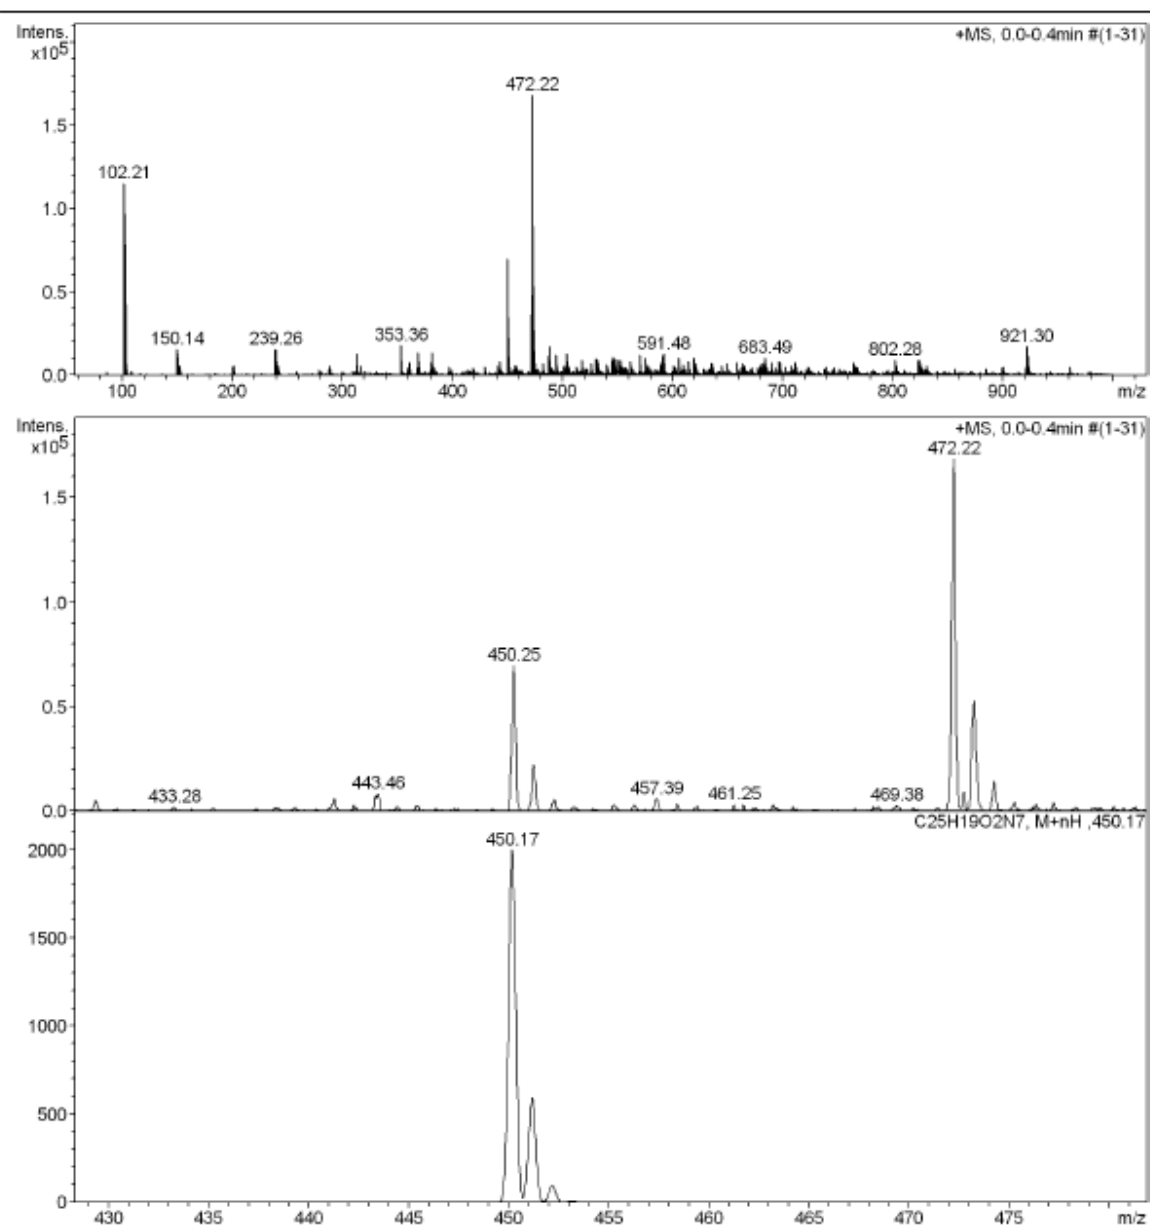

**Figure S19.** Positive ion mode ESI-mass spectrum of **HL**<sup>1</sup>.

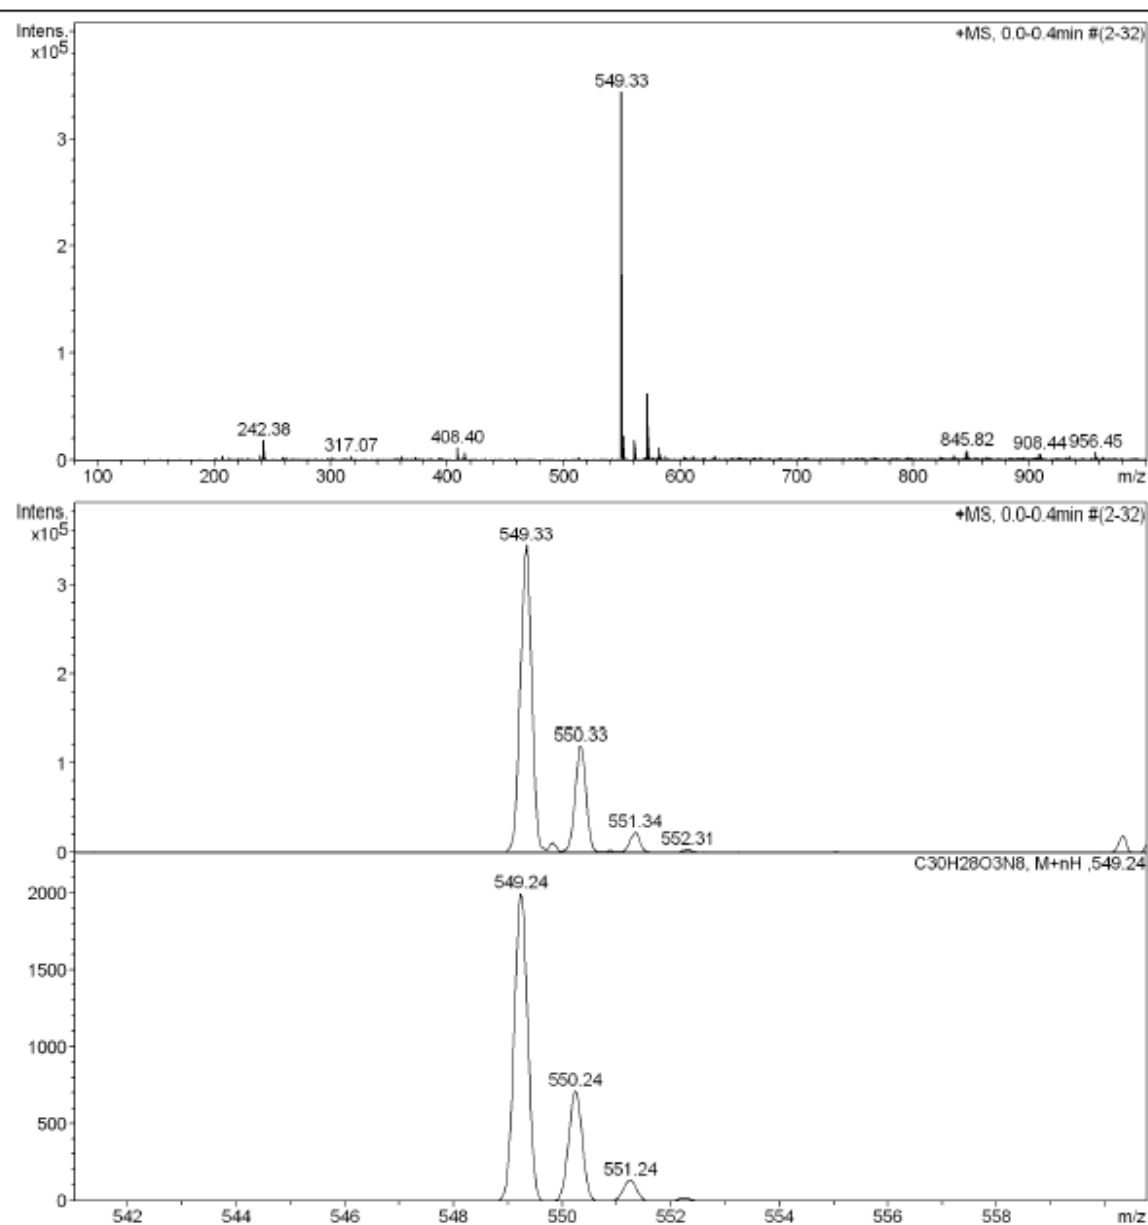

**Figure S20.** Positive ion mode ESI-mass spectrum of **HL<sup>2</sup>**.

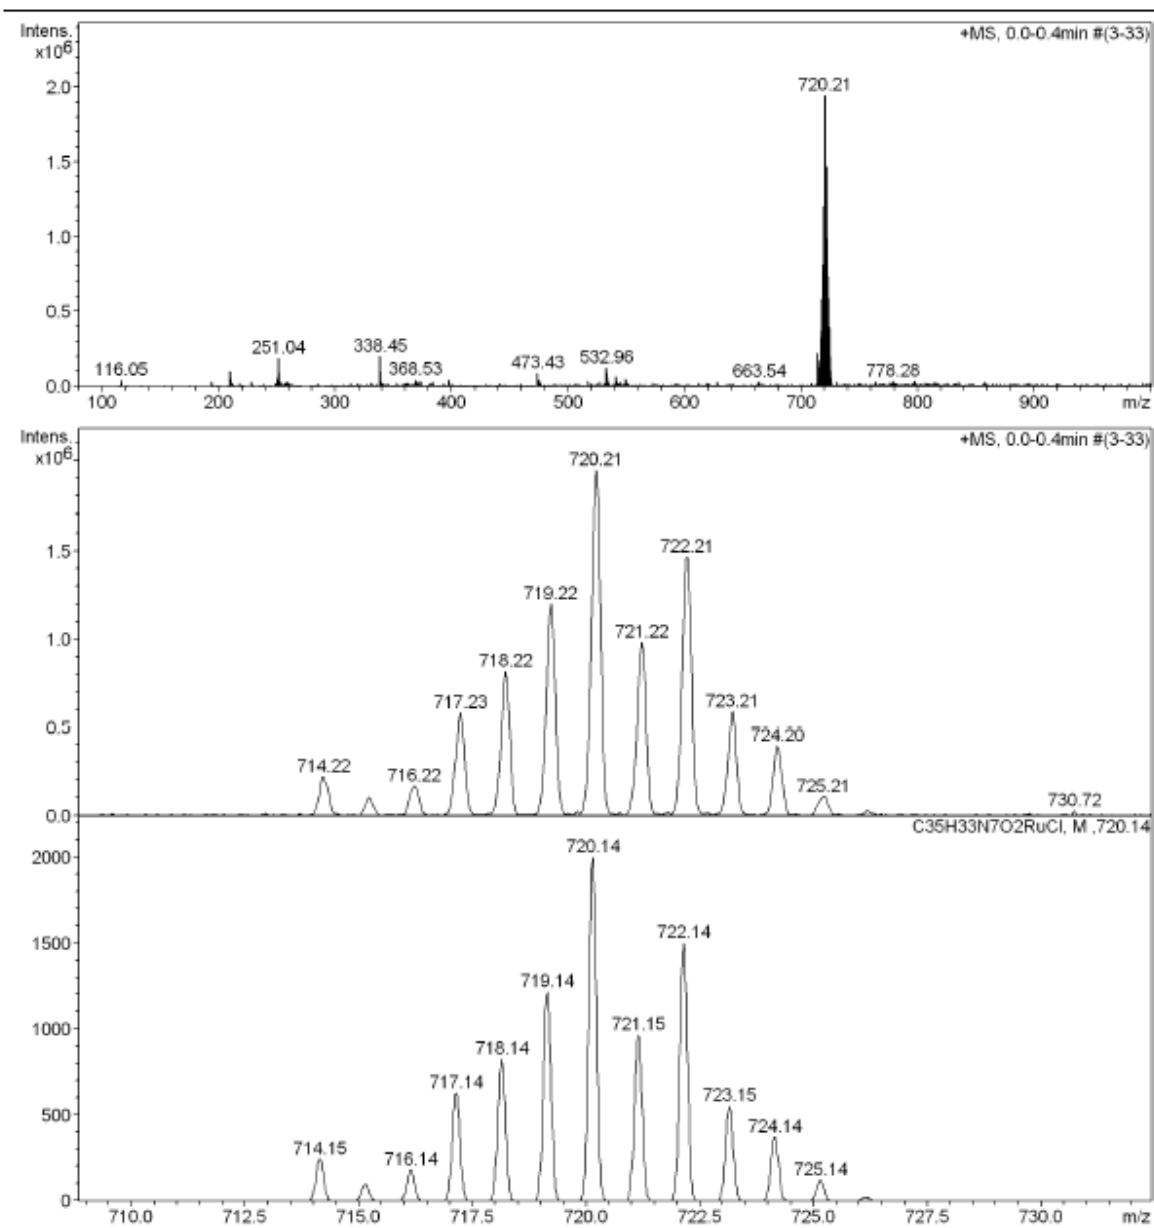

**Figure S21.** Positive ion mode ESI-mass spectrum of **1**.

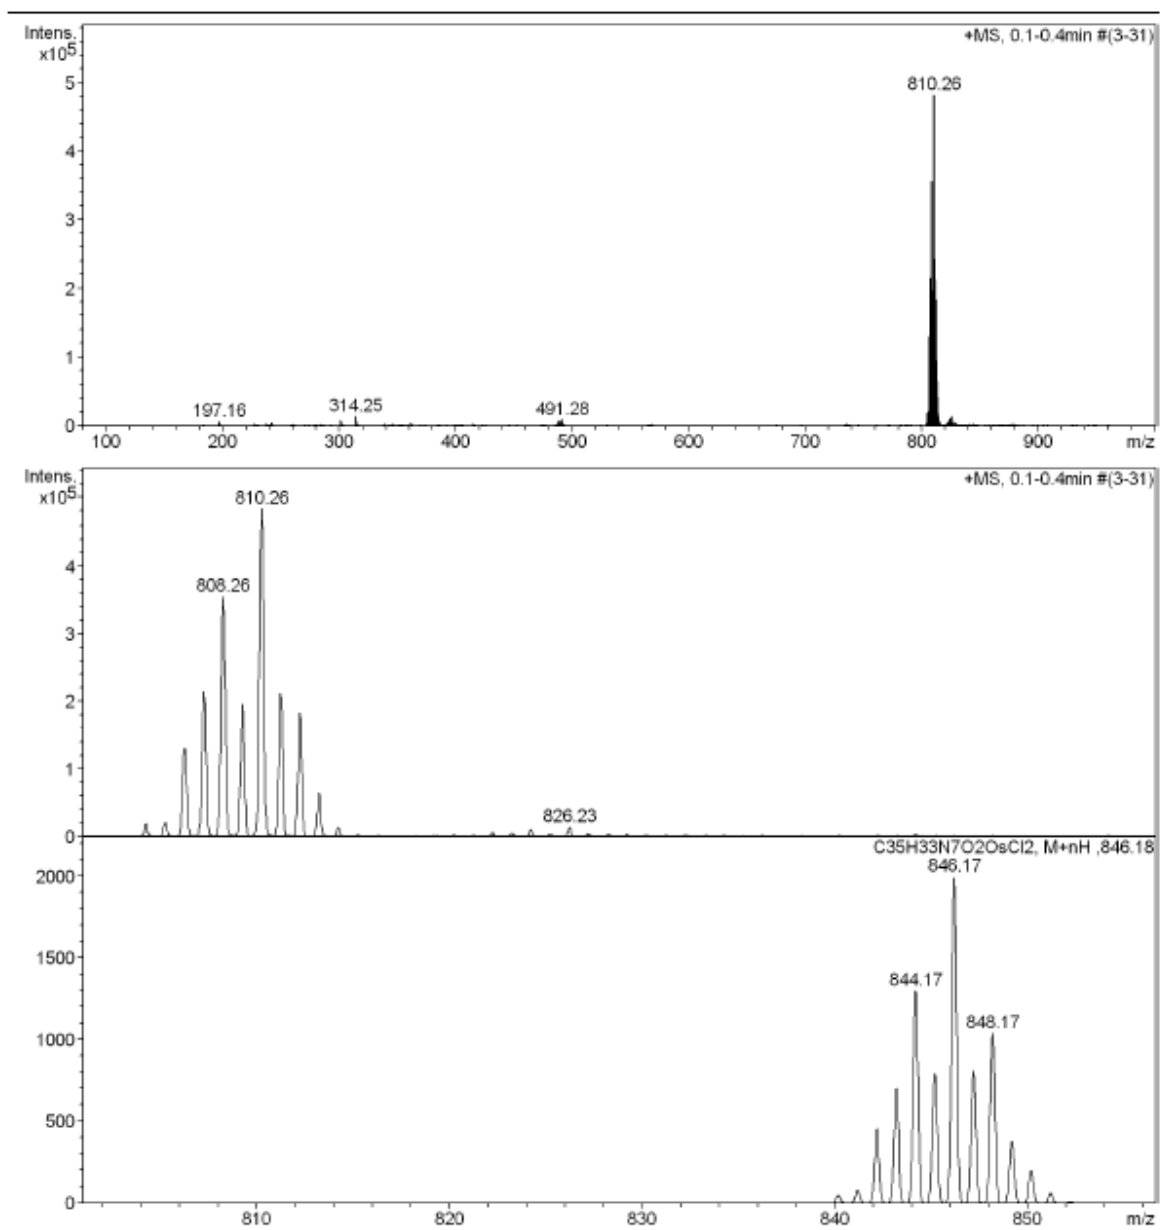

**Figure S22.** Positive ion mode ESI-mass spectrum of **2**.

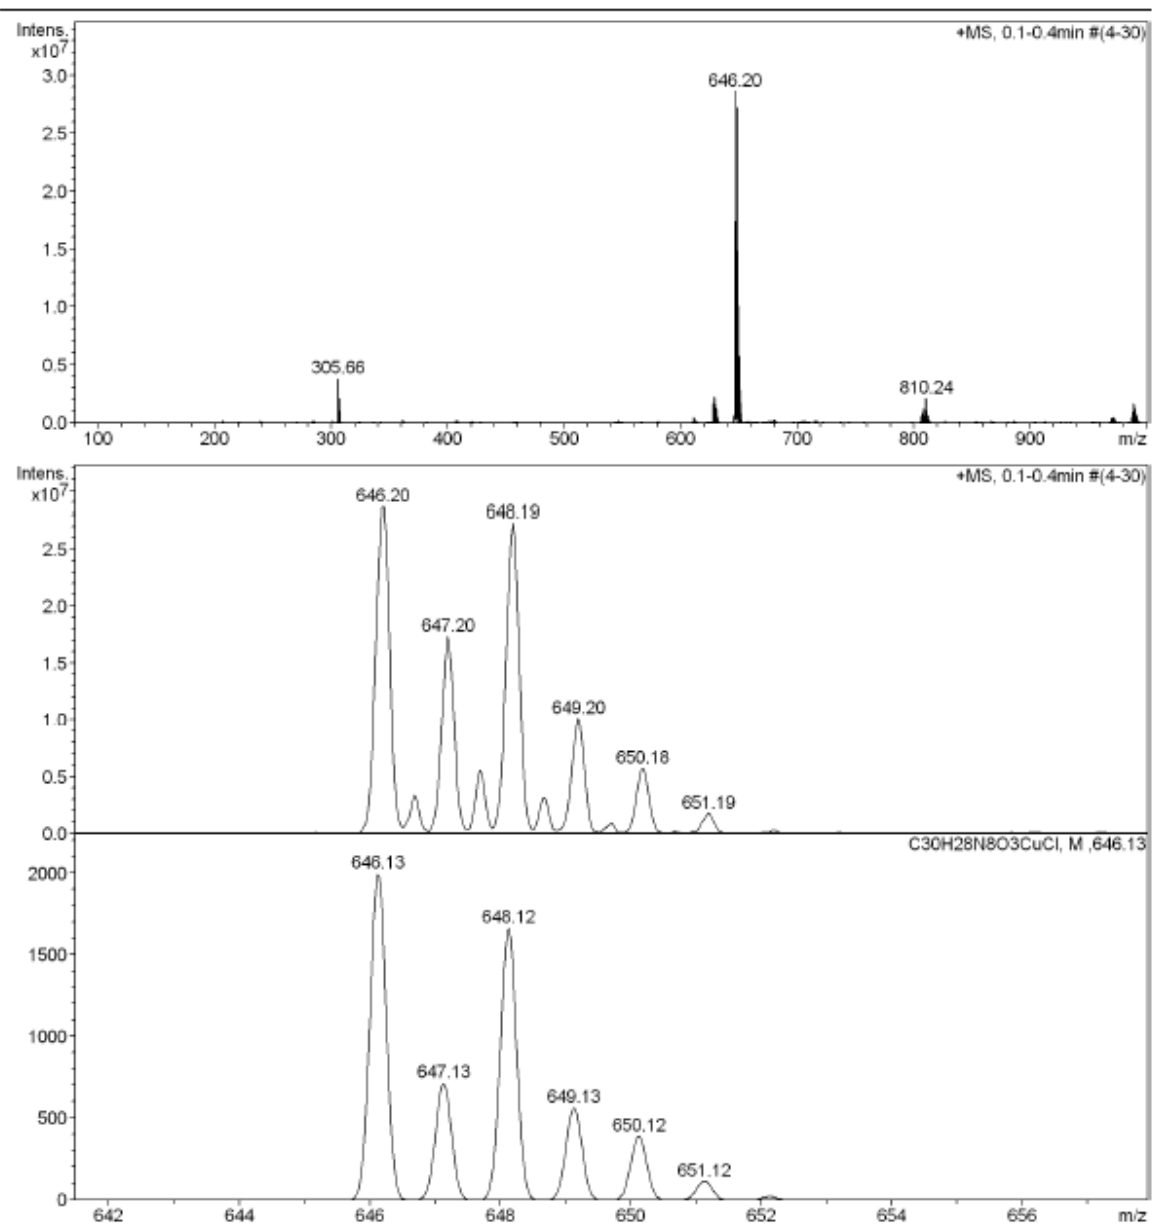

**Figure S23.** Positive ion mode ESI-mass spectrum of **3**.

## Molecular Docking

**Table S3.** The binding affinities as predicted by the scoring functions for the Pim1 kinase. **LI7** is the co-crystallized ligand. Root-mean-square deviation – RMSD from the co-crystallized ligand (heavy atoms) in Å.

| Ligands      | GS     | CS     | ChemPLP | ASP    |
|--------------|--------|--------|---------|--------|
| <b>B</b>     | 51.6   | 32.3   | 69.6    | 40.0   |
| <b>A</b>     | 44.9   | 33.7   | 66.5    | 35.8   |
| <b>LI7</b>   | 50.5   | 31.4   | 58.0    | 28.4   |
| <b>RMSD:</b> | 0.9020 | 3.1517 | 0.5348  | 6.7059 |

**Table S4.** The molecular descriptors as calculated by QikProp and their corresponding Known Drug Indexes 2a and 2b (KDI<sub>2a/2b</sub>).

|          | RB | MW(g/mol) | HD | HA  | Log P | PSA (Å <sup>2</sup> ) | KDI <sub>2A</sub> | KDI <sub>2B</sub> |
|----------|----|-----------|----|-----|-------|-----------------------|-------------------|-------------------|
| <b>B</b> | 3  | 390.4     | 3  | 4.5 | 2.4   | 162.3                 | 4.92              | 0.20              |
| <b>A</b> | 2  | 293.3     | 2  | 3.5 | 2.0   | 98.3                  | 5.19              | 0.40              |

**Table S5.** Definition of lead-like, drug-like and Known Drug Space (KDS) in terms of molecular descriptors. The values given are the maxima for each descriptor for the volumes of chemical space used.

|                                            | Lead-like Space | Drug-like Space | Known Drug Space |
|--------------------------------------------|-----------------|-----------------|------------------|
| Molecular weight (g mol <sup>-1</sup> )    | 300             | 500             | 800              |
| Lipophilicity (Log P)                      | 3               | 5               | 6.5              |
| Hydrogen bond donors (HD)                  | 3               | 5               | 7                |
| Hydrogen bond acceptors (HA)               | 3               | 10              | 15               |
| Polar surface area (Å <sup>2</sup> ) (PSA) | 60              | 140             | 180              |
| Rotatable bonds (RB)                       | 3               | 10              | 17               |

**Table S6.** The single point and corrected zero-point vibrational energies (ZPE) of **B** in hartrees (a.u.).

| Systems               | Energy/a.u. | ZPE/a.u. <sup>a</sup> |
|-----------------------|-------------|-----------------------|
| <b>B</b>              | −1362.24233 | 0.31450644            |
| <b>B<sup>•+</sup></b> | −1361.9785  | 0.31396035            |
| <b>B<sup>•−</sup></b> | −1362.2934  | 0.31071621            |
| Fragment 1            | −985.962007 | 0.24248527            |
| Fragment 2            | −376.173285 | 0.06496719            |

Corrected according to Wong<sup>1</sup>
